# Supplementary material for: Computational Assessment of the Cooperativity between RNA Binding Proteins and MicroRNAs in Transcript Decay
Source: PubMed Central journal article supplement (PMC3667768; doi:10.1371/journal.pcbi.1003075), 2013-05-30

# Supplementary Figure S3

## A. *H.sapiens*

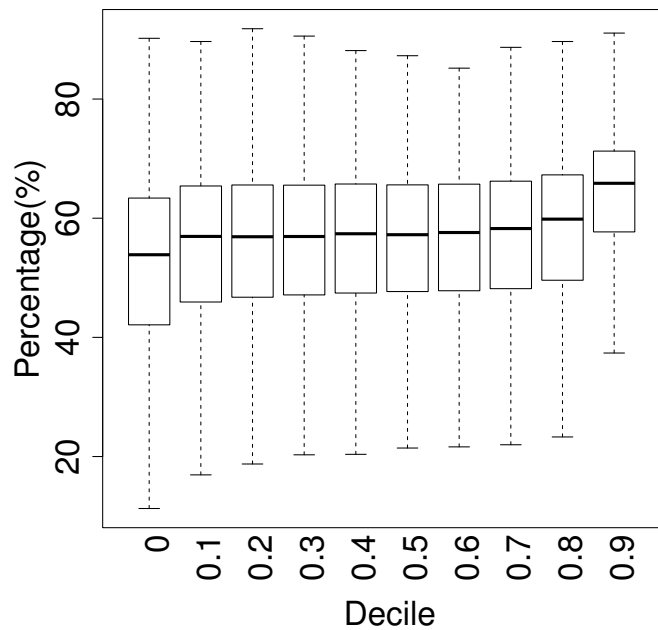

## B. *M.musculus*

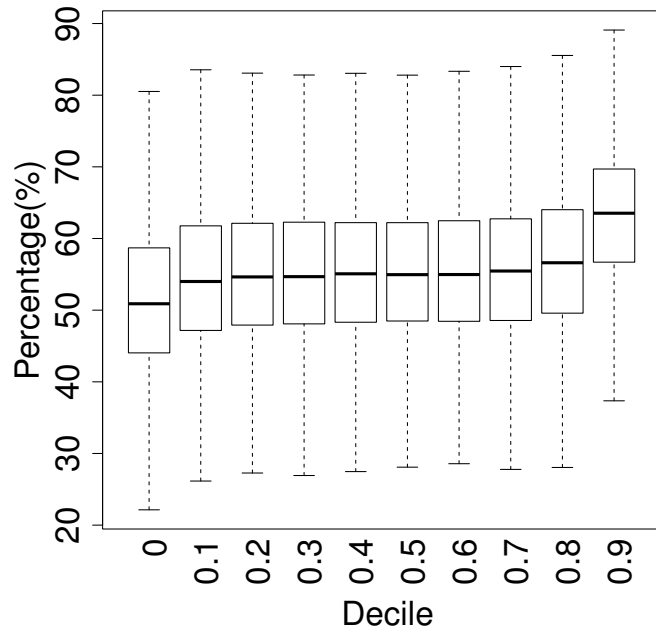

## C. *D.melanogaster*

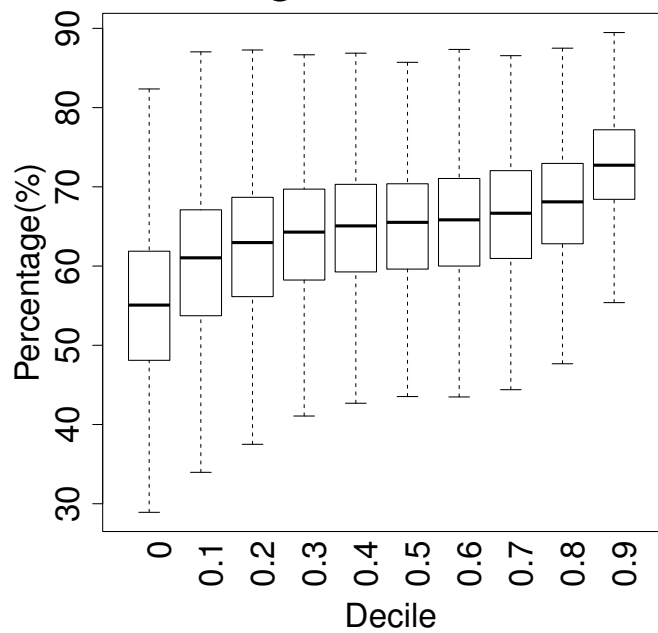

## D. *C.elegans*

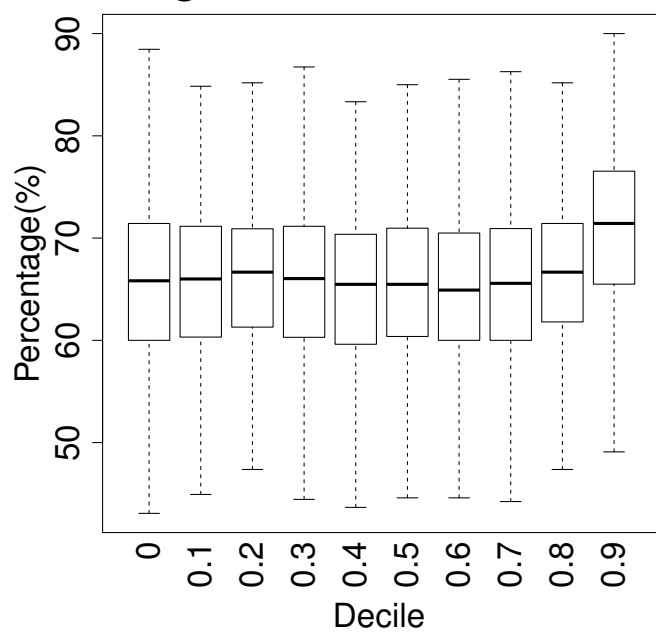

Supplement: pcbi.1003075.s003.pdf [file pcbi.1003075.s003.pdf]
