# Supplementary material for: Computational Assessment of the Cooperativity between RNA Binding Proteins and MicroRNAs in Transcript Decay
Source: PubMed Central journal article supplement (PMC3667768; doi:10.1371/journal.pcbi.1003075), 2013-05-30

# Supplementary Figure S12

## A. Human

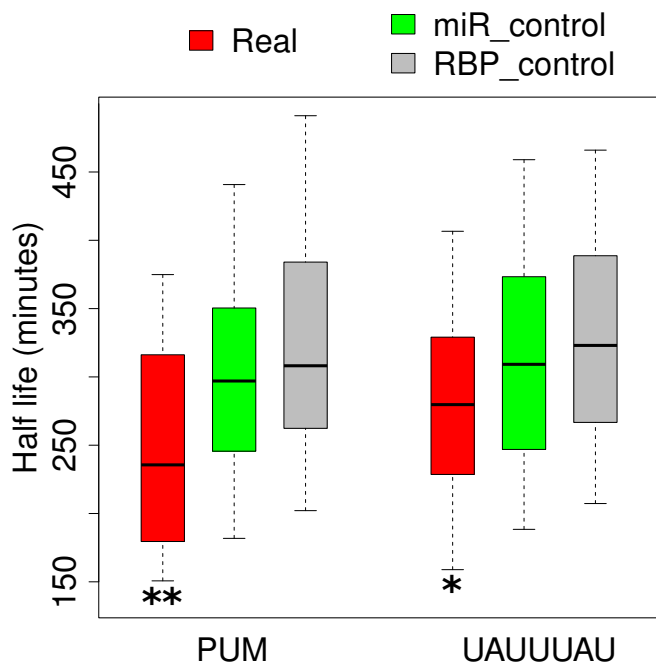

## B. Mouse

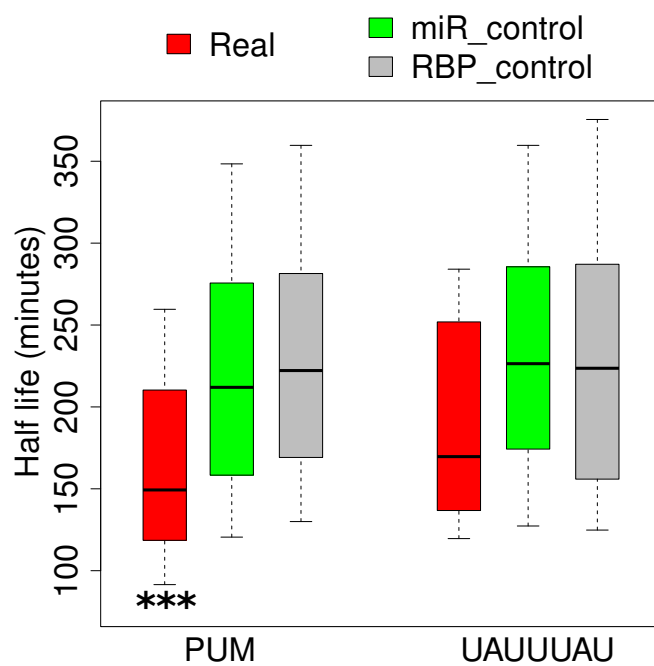

## C. Human

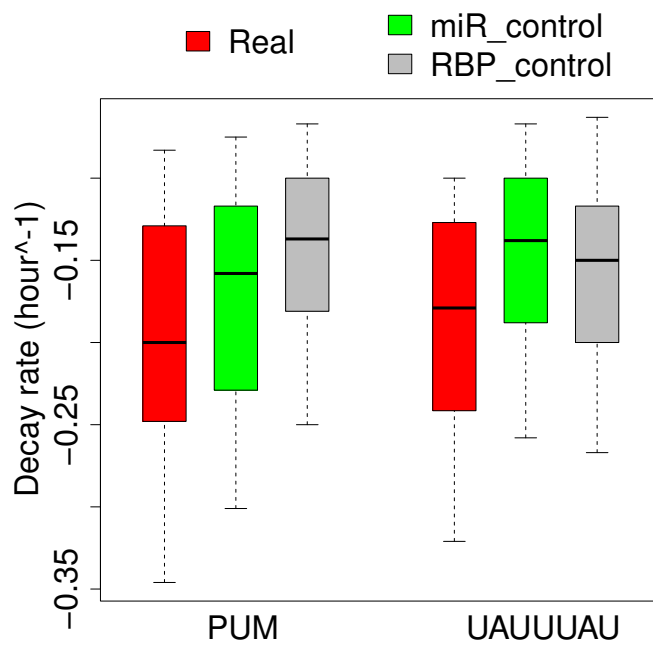

Supplement: pcbi.1003075.s012.pdf [file pcbi.1003075.s012.pdf]
