# Supplementary material for: Computational Assessment of the Cooperativity between RNA Binding Proteins and MicroRNAs in Transcript Decay
Source: PubMed Central journal article supplement (PMC3667768; doi:10.1371/journal.pcbi.1003075), 2013-05-30

# Supplementary Figure S14

## A. miR-30abcde/384-5p

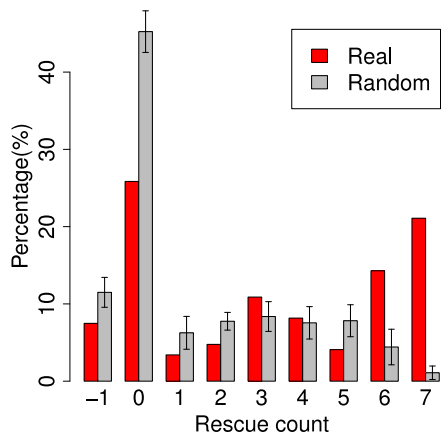

## B. miR-144

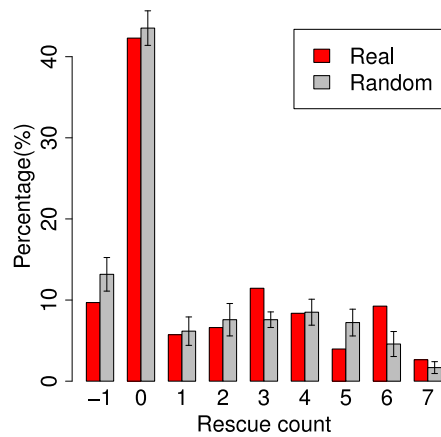

## C. miR-300

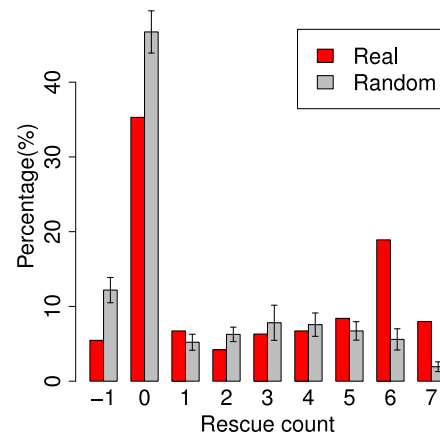

## D. miR-101

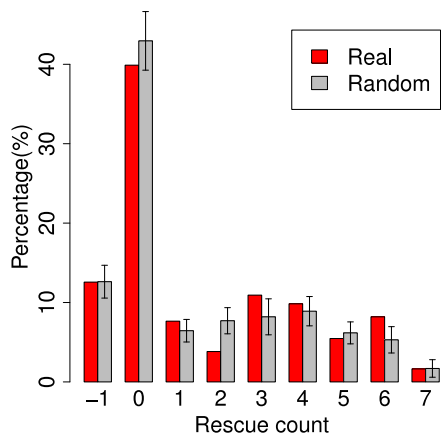

## E. miR-376c

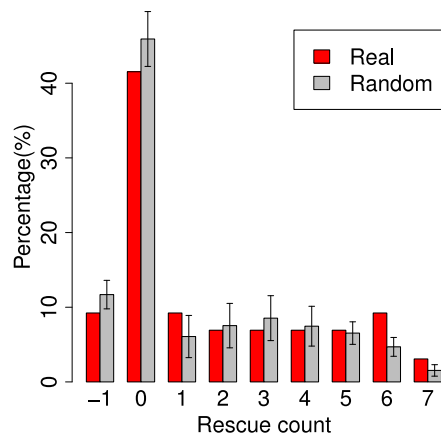

## F. miR-221/222

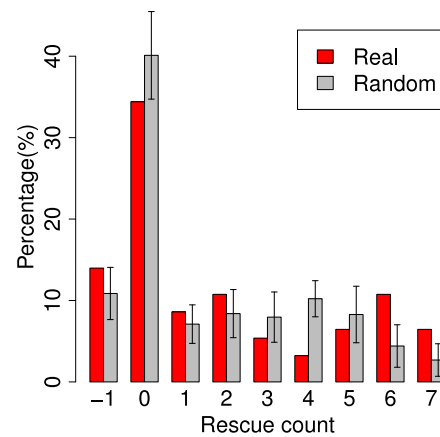

## G. miR-410

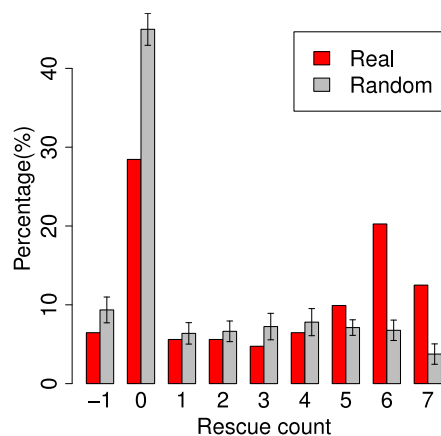

Supplement: pcbi.1003075.s014.pdf [file pcbi.1003075.s014.pdf]
