# Supplementary material for: Computational Assessment of the Cooperativity between RNA Binding Proteins and MicroRNAs in Transcript Decay
Source: PubMed Central journal article supplement (PMC3667768; doi:10.1371/journal.pcbi.1003075), 2013-05-30
Supplement: pcbi.1003075.s017.pdf [file pcbi.1003075.s017.pdf]

## Supplementary Table S2

| RBP     | Recognition motif | Interacting miRNA seeds |
|---------|-------------------|-------------------------|
| PUM     | 81.3%             | 69.4%                   |
| UAUUUAU | 100%              | 71.4%                   |
