# Supplementary material for: Computational Assessment of the Cooperativity between RNA Binding Proteins and MicroRNAs in Transcript Decay
Source: PubMed Central journal article supplement (PMC3667768; doi:10.1371/journal.pcbi.1003075), 2013-05-30
Supplement: pcbi.1003075.s018.pdf [file pcbi.1003075.s018.pdf]

## Supplementary Table S3

|                | <b>PUM</b> | <b>UAUUUAU</b> |
|----------------|------------|----------------|
| H.sapiens      | 1.12       | 1.14           |
| M.musculus     | 1.12       | 1.06           |
| D.melanogaster | 0.87       | 0.95           |
| C.elegans      | 1.07       | 0.87           |
