# Supplementary material for: Computational Assessment of the Cooperativity between RNA Binding Proteins and MicroRNAs in Transcript Decay
Source: PubMed Central journal article supplement (PMC3667768; doi:10.1371/journal.pcbi.1003075), 2013-05-30
Supplement: pcbi.1003075.s019.pdf [file pcbi.1003075.s019.pdf]

## Supplementary Table S4

| RBP      | miRNA              | Half life (minutes) |         | Number of mRNAs |         | P-value |
|----------|--------------------|---------------------|---------|-----------------|---------|---------|
|          |                    | Proximal            | Distant | Proximal        | Distant |         |
| PUM      | miR-30abcde/384-5p | 214.7               | 302.1   | 55              | 605     | 1.21E-2 |
|          | miR-101            | 254.6               | 300.2   | 88              | 585     | 9.06E-3 |
| UAUUUUAU | miR-30abcde/384-5p | 262.4               | 304.8   | 69              | 691     | 2.78E-3 |
|          | miR-26ab/1297      | 309.0               | 310.3   | 64              | 696     | 4.29E-1 |

(a) Human Friedel

| RBP      | miRNA              | Half life (minutes) |         | Number of mRNAs |         | P-value |
|----------|--------------------|---------------------|---------|-----------------|---------|---------|
|          |                    | Proximal            | Distant | Proximal        | Distant |         |
| PUM      | miR-30abcde/384-5p | 138.8               | 187.1   | 57              | 539     | 5.76E-2 |
|          | miR-101            | 153.3               | 195.9   | 72              | 557     | 4.03E-2 |
| UAUUUUAU | miR-26ab/1297      | 169.65              | 208.0   | 64              | 565     | 2.18E-1 |

(b) Mouse Friedel

| RBP      | miRNA              | Decay rate (hour <sup>-1</sup> ) |         | Number of mRNAs |         | P-value |
|----------|--------------------|----------------------------------|---------|-----------------|---------|---------|
|          |                    | Proximal                         | Distant | Proximal        | Distant |         |
| PUM      | miR-410            | -0.221                           | -0.15   | 48              | 273     | 1.45E-2 |
|          | miR-376c           | -0.22625                         | -0.15   | 32              | 165     | 9.95E-2 |
|          | miR-30abcde/384-5p | -0.146                           | -0.179  | 21              | 251     | 2.50E-1 |
|          | miR-101            | -0.1405                          | -0.15   | 34              | 241     | 4.08E-1 |
| UAUUUUAU | miR-30abcde/384-5p | -0.233                           | -0.163  | 21              | 271     | 3.20E-1 |
|          | miR-26ab/1297      | -0.179                           | -0.15   | 25              | 286     | 1.82E-1 |

(c) Human Yang
