# Supplementary material for: Computational Assessment of the Cooperativity between RNA Binding Proteins and MicroRNAs in Transcript Decay
Source: PubMed Central journal article supplement (PMC3667768; doi:10.1371/journal.pcbi.1003075), 2013-05-30
Supplement: pcbi.1003075.s020.pdf [file pcbi.1003075.s020.pdf]

## Supplementary Table S5

| RBP      | miRNA              | Conservation BLS |         | Number of RBP sites |         | P-value |
|----------|--------------------|------------------|---------|---------------------|---------|---------|
|          |                    | Proximal         | Distant | Proximal            | Distant |         |
| PUM      | miR-30abcde/384-5p | 0.686            | 0.630   | 147                 | 1773    | 7.00E-2 |
|          | miR-144            | 0.702            | 0.649   | 227                 | 2003    | 7.12E-3 |
|          | miR-300            | 0.767            | 0.633   | 236                 | 2299    | 9.03E-6 |
|          | miR-101            | 0.712            | 0.657   | 183                 | 1765    | 7.38E-4 |
|          | miR-376c           | 0.706            | 0.607   | 130                 | 1404    | 3.01E-3 |
|          | miR-221/222        | 0.722            | 0.646   | 92                  | 1212    | 2.41E-2 |
| UAUUUUAU | miR-410            | 0.654            | 0.604   | 230                 | 1971    | 2.74E-2 |
|          | miR-30abcde/384-5p | 0.612            | 0.462   | 208                 | 2258    | 1.39E-4 |
|          | miR-144            | 0.626            | 0.475   | 215                 | 2365    | 1.42E-5 |
|          | miR-494            | 0.511            | 0.453   | 244                 | 2865    | 2.81E-1 |
|          | miR-26ab/1297      | 0.485            | 0.443   | 167                 | 2188    | 2.26E-1 |

(a) Human

| RBP      | miRNA              | Conservation BLS |         | Number of RBP sites |         | P-value |
|----------|--------------------|------------------|---------|---------------------|---------|---------|
|          |                    | Proximal         | Distant | Proximal            | Distant |         |
| PUM      | miR-30abcde/384-5p | 0.297            | 0.262   | 146                 | 1450    | 4.18E-1 |
|          | miR-144            | 0.338            | 0.252   | 180                 | 1586    | 1.80E-3 |
|          | miR-300            | 0.336            | 0.247   | 222                 | 1800    | 3.13E-4 |
|          | miR-101            | 0.354            | 0.266   | 153                 | 1526    | 2.57E-3 |
|          | miR-376c           | 0.253            | 0.207   | 107                 | 1084    | 1.43E-1 |
| UAUUUUAU | miR-300            | 0.257            | 0.183   | 189                 | 1770    | 1.75E-4 |
|          | miR-494            | 0.203            | 0.166   | 165                 | 1812    | 6.21E-2 |
|          | miR-26ab/1297      | 0.181            | 0.165   | 141                 | 1533    | 1.02E-1 |
|          | miR-181            | 0.271            | 0.174   | 152                 | 1653    | 1.74E-5 |
|          | miR-495/1192       | 0.198            | 0.176   | 272                 | 2210    | 3.45E-1 |

(b) Mouse
