# Supplementary material for: Computational Assessment of the Cooperativity between RNA Binding Proteins and MicroRNAs in Transcript Decay
Source: PubMed Central journal article supplement (PMC3667768; doi:10.1371/journal.pcbi.1003075), 2013-05-30
Supplement: pcbi.1003075.s021.pdf [file pcbi.1003075.s021.pdf]

## Supplementary Table S6

| GO Biological process                                      | #genes | P-value |
|------------------------------------------------------------|--------|---------|
| protein binding transcription factor activity              | 38     | 4.09E-4 |
| transcription factor binding transcription factor activity | 37     | 5.36E-4 |
| transcription cofactor activity                            | 36     | 5.39E-4 |
